# Supplementary material for: Estimation of delay to diagnosis and incidence in HIV using indirect evidence of infection dates
Source: BMC Med Res Methodol. 2018 Jun 27;18:65. doi: 10.1186/s12874-018-0522-x (PMC6020319; doi:10.1186/s12874-018-0522-x)
Supplement: Supplementary file 2 — R script (viewable as plain text) to read in parameter estimates for the calibration dataset and to then simulate a cohort of patients with increasing incidence of HIV and a limited observation window for diagnoses. The same R script fits an ‘incidence and delay-to-diagnosis’ model to the generated data using a Stan model template file provided. (R 17 kb) [file 12874_2018_522_MOESM2_ESM.r]

#################################
# Coding by Oliver Stirrup, UCL #
#################################

### Last updated 6 June 2018

#################
# Load packages #
#################

library("MASS") #Used for mvrnorm()
library("boot")	#Used for inv.logit()
library("rstan")
library("parallel")

n_cores<- 1	#Set to higher number if available for parallel MCMC chains
options(mc.cores = n_cores)

###########################
# Import parameter values #
###########################

### Read in summary of posterior distribution of model parameters obtained from calibration dataset
Para_V <- as.matrix(read.csv(file="Para_V.csv",  header=FALSE))
parameter_info <- read.csv(file="parameter_info.csv", stringsAsFactors=FALSE)

n_paras<-nrow(parameter_info)

### Process parameters for data simulation

#CD4-VL random effects correlations
Omega<-diag(1, nrow=4)
Omega[2,1]<-parameter_info[parameter_info$para=="Omega[2,1]","mean"]
Omega[3,1]<-parameter_info[parameter_info$para=="Omega[3,1]","mean"]
Omega[3,2]<-parameter_info[parameter_info$para=="Omega[3,2]","mean"]
Omega[4,1]<-parameter_info[parameter_info$para=="Omega[4,1]","mean"]
Omega[4,2]<-parameter_info[parameter_info$para=="Omega[4,2]","mean"]
Omega[4,3]<-parameter_info[parameter_info$para=="Omega[4,3]","mean"]
Omega[upper.tri(Omega)]<-t(Omega)[upper.tri(Omega)]

#CD4-VL random effects SDs
sigmaU<-numeric(4)
sigmaU[1]<-parameter_info[parameter_info$para=="sigmaU[1]","mean"]
sigmaU[2]<-parameter_info[parameter_info$para=="sigmaU[2]","mean"]
sigmaU[3]<-parameter_info[parameter_info$para=="sigmaU[3]","mean"]
sigmaU[4]<-parameter_info[parameter_info$para=="sigmaU[4]","mean"]

#CD4-VL random effects covariance matrix
Omega_V<- diag(sigmaU) %*% Omega %*% diag(sigmaU)

vdf<-exp(parameter_info[parameter_info$para=="log_vdf","mean"])
kappa<-exp(parameter_info[parameter_info$para=="log_kappa","mean"])
H_par<-inv.logit(parameter_info[parameter_info$para=="logit_H","mean"])
sigma2_cd4<-exp(parameter_info[parameter_info$para=="log_sigma2_cd4","mean"])
CD4_intercept<-parameter_info[parameter_info$para=="int_cd4","mean"]
CD4_slope<-parameter_info[parameter_info$para=="slope_cd4","mean"]

beta_VL<-parameter_info[parameter_info$para %in% c("beta_VL[1]","beta_VL[2]","beta_VL[3]","beta_VL[4]"),"mean"]
sigma_VL<-exp(parameter_info[parameter_info$para=="log_sigma_VL","mean"])

logit_theta<-parameter_info[parameter_info$para %in% c("logit_theta[1]","logit_theta[2]"),"mean"]
log_alpha<-parameter_info[parameter_info$para %in% c("log_alpha[1]","log_alpha[2]"),"mean"]
log_beta<-parameter_info[parameter_info$para %in% c("log_beta[1]","log_beta[2]"),"mean"]


# Define CD4 fractional Brownian motion covariance function for data generation
CD4_cov_fun <- function(a,b,kappa,H_par,gamma_i) {0.5*(kappa/gamma_i)*(a^(2*H_par)+b^(2*H_par)-abs(a-b)^(2*H_par))}

##############################################################
# Simulate patient data with infection and diagnosis times   #
##############################################################
set.seed(42)

### Generate vector of infection times

present_time<-0	#Value updated at each newly occuring case
incident_time_vec<-numeric()	#New value added to vector for each simulated case
i<-1	#Index updated for i^th patient

# Poisson process is generated using property that intervals between events are exponential variates
# The incidence rate increases incrementally from 20/year to 200/year over the course of 9 years, then remains at that value for 5 years

while(present_time<1) {
			incident_time_vec[i]<-present_time+rexp(1,rate=20)
			present_time<-incident_time_vec[i]
			i<-i+1		
			}
			
while(present_time<2) {
			incident_time_vec[i]<-present_time+rexp(1,rate=40)
			present_time<-incident_time_vec[i]
			i<-i+1		
			}

while(present_time<3) {
			incident_time_vec[i]<-present_time+rexp(1,rate=60)
			present_time<-incident_time_vec[i]
			i<-i+1		
			}
			
while(present_time<4) {
			incident_time_vec[i]<-present_time+rexp(1,rate=80)
			present_time<-incident_time_vec[i]
			i<-i+1		
			}

while(present_time<5) {
			incident_time_vec[i]<-present_time+rexp(1,rate=100)
			present_time<-incident_time_vec[i]
			i<-i+1		
			}

while(present_time<6) {
			incident_time_vec[i]<-present_time+rexp(1,rate=120)
			present_time<-incident_time_vec[i]
			i<-i+1		
			}

			
while(present_time<7) {
			incident_time_vec[i]<-present_time+rexp(1,rate=140)
			present_time<-incident_time_vec[i]
			i<-i+1		
			}
			

while(present_time<8) {
			incident_time_vec[i]<-present_time+rexp(1,rate=160)
			present_time<-incident_time_vec[i]
			i<-i+1		
			}
			
while(present_time<9) {
			incident_time_vec[i]<-present_time+rexp(1,rate=180)
			present_time<-incident_time_vec[i]
			i<-i+1		
			}
			
while(present_time<14) {
			incident_time_vec[i]<-present_time+rexp(1,rate=200)
			present_time<-incident_time_vec[i]
			i<-i+1		
			}

### Simulate observations times and biomarker data for patient cohort
#NOTE: Simulated data are structured with patient characteristics and viral ambiguity information duplicated across multiple rows
# of a dataframe, with each individual row also containing the time and value of a CD4 or VL observation. This overall dataframe 
# is then separated out into dataframes for CD4, VL and ambiguity/patient characteristics before vectors of data and information
# regarding the number of observations per patient are inputted to the Stan model. This was the approach used for the real clinical
# data analysed.

N_pats<- length(incident_time_vec)
print(N_pats)
cons_extra<- 100	#Additional random effects generated to account for 'rejected' patients with negative CD4 before observation
b_vals<-data.frame(mvrnorm(n=N_pats+cons_extra,c(0,0,0,0),Omega_V))	#CD4-VL random effects generated
gamma_vals<-rgamma(n=N_pats+cons_extra,shape=vdf*0.5,rate=vdf*0.5)	#fBM variability random effects generated
t_vec<-c(0,0.125,0.25,seq(0.5,3,0.5)) #Observation time vector post Dx
delay_rate<-0.5	#Rate parameter for delay-to-diagnosis
Dx_t_vec<-rexp(rate=delay_rate, n=N_pats+cons_extra)	#Vector of Dx delays generated
age_at_inf<- 32	#Age at infection fixed for all patients for simplicity


i<- 1	#Indexing of sampled random effects and Dx delays
j<- 1	#Indexing of observed patients making it into sample (i.e. excluding generated patients with first observation of CD4 -ve)

while (j<=N_pats) {

	if(j%%50==0){print(j)}
	t_vec_true_i<-t_vec+Dx_t_vec[i]	#Biomarker observation times relative to inf. date

	CD4_cov_mat_i<-outer(t_vec_true_i, t_vec_true_i, function(a,b) CD4_cov_fun(a=a,b=b,kappa=kappa,H_par=H_par,gamma_i=gamma_vals[i]))
	CD4_mean_vec<- (CD4_intercept+b_vals[i,1]) + (CD4_slope+b_vals[i,2])*t_vec_true_i
	CD4_val_vec<-unname(data.frame(mvrnorm(n=1,CD4_mean_vec,CD4_cov_mat_i)+ rnorm(n=length(t_vec),mean=0,sd=sqrt(sigma2_cd4)))) 

	VL_int_tmp = beta_VL[1] + b_vals[i,3]
	VL_slope_tmp = beta_VL[2] + b_vals[i,4]
	
	mu_VL = VL_int_tmp + VL_slope_tmp*t_vec_true_i + beta_VL[3]*exp(-exp(beta_VL[4])*t_vec_true_i)
	VL_val_vec<- mu_VL + rnorm(n=length(mu_VL),mean=rep(0, length(mu_VL)),sd=sigma_VL)

	#'t_pos' is observation time variable for biomarkers relative to Dx, CD4 generated on SQRT scale and VL on log10 scale
	sim_data_i<-data.frame(pat_num=rep(i,length(CD4_val_vec)),value=CD4_val_vec,variable=rep("CD4", length(CD4_val_vec)),t_true=t_vec_true_i,t_pos=t_vec)
	sim_data_i<-rbind(sim_data_i, data.frame(pat_num=rep(i,length(VL_val_vec)),value=VL_val_vec,variable=rep("VL",length(VL_val_vec)),t_true=t_vec_true_i,t_pos=t_vec))
	sim_data_i$Dx_delay<-Dx_t_vec[i]
	
	sim_data_CD4_neg<-sim_data_i[(sim_data_i$variable=="CD4" & sim_data_i$value<0),]	#Pick out -ve CD4 counts, if any
	if(nrow(sim_data_CD4_neg)>0){
			censor_cd4_t<-min(sim_data_CD4_neg$t_true)
			sim_data_i<-sim_data_i[sim_data_i$t_true<censor_cd4_t,]	#Remove any CD4 and VL obs occuring after -ve CD4 count
			}

	#Generate ambiguity observation if patient is not to be excluded
	if(nrow(sim_data_i)>0){
		t_amb_true<-Dx_t_vec[i]	#Observation time relative to inf. is Dx delay
		prob_ambig_zero<-inv.logit(logit_theta[1] + t_amb_true*logit_theta[2])
		ambig_present<- 1-rbinom(n=1,size=1,prob=prob_ambig_zero)
		amb_alpha= exp(log_alpha[1] + t_amb_true*log_alpha[2])
		amb_beta= exp(log_beta[1] + t_amb_true*log_beta[2])
		amb_obs<-rbeta(n=1,shape1=amb_alpha,shape2=amb_beta)*ambig_present
		sim_data_i$ambiguity<-amb_obs
		sim_data_i$t_pos_amb<-t_amb_true-Dx_t_vec[i]	#'t_pos_amb' is time of sequencing relative to Dx, here set to zero

		#Patient age in model centred at 32 years
		sim_data_i$age_at_postest_centred<-age_at_inf+Dx_t_vec[i]-32
		sim_data_i$age_at_postest_centred2<-sim_data_i$age_at_postest_centred^2

		sim_data_i$first_obs<-0
		sim_data_i[1,]$first_obs<-1

		sim_data_i$n_cd4<-sum(sim_data_i$variable=="CD4")	#Number of CD4 obs in i^th patient
		sim_data_i$n_VL<-sum(sim_data_i$variable=="VL")	#Number of VL obs in i^th patient

		#Generate 'calendar' times of inf. and Dx
		sim_data_i$cal_inf_time<-incident_time_vec[j]
		sim_data_i$cal_obs_time<-incident_time_vec[j] + Dx_t_vec[i]

		#Store n^th year of 'calendar' time for Dx
		sim_data_i$year_obs<-ceiling(sim_data_i$cal_obs_time)

		if(j==1){
			sim_data<-sim_data_i
			} else {
			sim_data<-rbind(sim_data, sim_data_i)
			}
		j<-j+1
		} else {print("Patient omitted")}	#For patients with first observation having -ve CD4, a new set of random effects and Dx delay is used, but inf. time is reused

	i<-i+1
	}

if(sum(sim_data$variable=="VL" & sim_data$value<0)>0) {sim_data[(sim_data$variable=="VL" & sim_data$value<log(50,base=10)),]$value<-0}	#Set very low VL to zero to code undetectable
sim_data$year_inf<-ceiling(sim_data$cal_inf_time)

#ggplot(data=sim_data[sim_data$first_obs==1,], aes(x=year_obs)) + geom_bar()
#ggplot(data=sim_data[sim_data$first_obs==1,], aes(x=factor(year_inf))) + geom_bar()

### Truncate dataset to only patients with Dx in 10^th to 14^th years of 'calendar' time (i.e. 9.0< cal_obs_time <14.0)

sim_data_trunc<-sim_data[sim_data$year_obs %in% 10:14,]
length(unique(sim_data_trunc$pat_num))


#######################################
# Process simulated data for analysis #
#######################################

data_amb<-sim_data_trunc[sim_data_trunc$first_obs==1,]	#Collapse data to 1 row per patient for ambiguity observations, n_CD4 and n_VL values, age and Dx time relative to analysis window
data_cd4<-sim_data_trunc[sim_data_trunc$variable=="CD4",]	#CD4 data only
data_VL<-sim_data_trunc[sim_data_trunc$variable=="VL",]	#VL data only

#'VL_lim_ind' is vector denoting undectable VL as '-1', in such cases the 'value' is reset to the limit of detection: 'log(50,base=10)'
VL_lim_ind<-rep(0,nrow(data_VL))
VL_lim_ind[data_VL$value==0]<- (-1)
if(sum(data_VL$value==0)>0){data_VL[data_VL$value==0,]$value<-log(50,base=10)}

earliestAge<-16	#Earliest possible age of infection, restricting range of Dx delay in model

####Details of data supplied as list to Stan model
#n_pat: total number of patients included
#N_cd4: total number of CD4 counts across all patients
#n_cd4_vec: vector of the number of CD4 counts in each patient
#N_VL: total number of VL obs across all patients
#n_VL_vec: vector of the number of VL obs in each patient
#t_ambig: vector of time (in years) of sequencing from Dx in each patient
#ambig: vector of ambiguity proportions in each patient
#sero_int: vector of maximum Dx delay (in years) in each patient
#sqrt_cd4: vector of all (SQRT) CD4 counts across all patients
#t_cd4: vector of time (in years) of CD4 counts from Dx across all patients
#log10VL: vector of all (log10) VL obs across all patients
#t_VL: vector of time (in years) of VL obs from Dx across all patients
#VL_lim_ind: vector denoting whether VL was undetectable (coded -1) or detectable (coded 0) across all patients
#age_at_postest: vector of age at Dx for all patients
#male_MSW & fem_MSW: indicator variables for hetero groups, here set to zero
#black & other_ethn: indicator variables for non-white ethnicity, here set to zero
#crf_subt, A_subt & C_subt: indicator variables for non-B subtypes, here set to zero
#Para_mean_vec: vector of posterior mean of each model parameter from calibration dataset
#Para_V: covariance matrix of posterior distribution of model parameters from calibration dataset
#T_window: duration (in years) of analysis window
#t_open_to_tpos: Vector of time (in years) from start of window period to Dx for each patient

#NOTE: in variables supplied to Stan, 'calendar time' is only defined relative to start of analysis window

data_for_stan<-list(n_pat=nrow(data_amb),N_cd4= nrow(data_cd4), n_cd4_vec=data_amb$n_cd4, 
			N_VL=nrow(data_VL), n_VL_vec=data_amb$n_VL, 
			t_ambig=data_amb$t_pos_amb,
			ambig=data_amb$ambiguity,
			sero_int=data_amb$age_at_postest_centred+32-earliestAge, 
			sqrt_cd4=data_cd4$value,
			t_cd4=data_cd4$t_pos,
			log10VL=data_VL$value,
			t_VL=data_VL$t_pos,
			VL_lim_ind=VL_lim_ind,
			age_at_postest=data_amb$age_at_postest_centred,
			male_MSW=rep(0,nrow(data_amb)), fem_MSW=rep(0,nrow(data_amb)),
			black=rep(0,nrow(data_amb)), other_ethn=rep(0,nrow(data_amb)),
			crf_subt=rep(0,nrow(data_amb)), A_subt=rep(0,nrow(data_amb)), C_subt=rep(0,nrow(data_amb)), other_subt=rep(0,nrow(data_amb)),
			Para_mean_vec=parameter_info$mean, Para_V=Para_V,
			T_window=5,
			t_open_to_tpos<- data_amb$cal_obs_time-9)

#Setting starting values for some parameters is necessary in order for MCMC chains to converge within reasonable timeframe
init_list_tmp<-list(int_cd4=23.5, slope_cd4=-1.18, beta_VL=c(4.338,0.07576,1.63,2.48),logit_theta=c(-0.0355,-0.665),log_alpha=c(0.018,0.0763),log_beta=c(5.27,-0.0137),log_lambda=-1,delay_to_Dx=rep(0.2,nrow(data_amb)),c_inc=6.5,b_inc_star=0.25, d_inc=0.01)
init_list<-list(init_list_tmp,init_list_tmp)	#A 'list of lists' is required, with the number of lists equal to the number of chains specified: here 2

#NOTE warnings from Stan parser can be ignored, as no non-linear transformations have been used for parameters in lines that are flagged up
date()
grp_fit <- stan(file = "Dx_delay_and_incidence_mod.stan", data = data_for_stan, iter = 1000, warmup =500, chains = 2, cores=n_cores, init_r=1, init=init_list, seed=62936)
date()

grp_fit


##########################################
# Generate plots of simulation results   #
##########################################

###Model fitting checks
stan_trace(grp_fit, inc_warmup=TRUE, pars=c("lambda","c_inc","b_inc","d_inc"))    #Check correct mixing of sample chains
stan_hist(grp_fit, pars=c("lambda","c_inc","b_inc","d_inc"))  #View histograms of posterior distributions for key parameters

###Generate plot of estimated incidence relative to that used for simulation, as in paper
fit_vec<-extract(grp_fit, pars=c("c_inc","b_inc","d_inc"), permuted = FALSE)    #Extract full vectors of samples for incidence parameters
fit_vec_stacked<-rbind(fit_vec[,1,],fit_vec[,2,])	#Stack chains into single column for each parameter; NOTE: requires adjustment if model fitting not run with 2 chains
x_vec<- seq(-10,5,0.1)  #Vector of evaluation points for plot (x is time relative to start of analysis window)

P5<-numeric()
P50<-numeric()
P95<-numeric()
for(i in 1:length(x_vec)) {
	inc_vals<-exp(fit_vec_stacked[,"c_inc"] + fit_vec_stacked[,"b_inc"]*x_vec[i] +(fit_vec_stacked[,"d_inc"]-fit_vec_stacked[,"b_inc"])*0.05*log(1+exp(20*x_vec[i])))
	P5[i]<-quantile(inc_vals,0.05)
	P50[i]<-quantile(inc_vals,0.50)
	P95[i]<-quantile(inc_vals,0.95)
	}

inc_centiles<-data.frame(x_vec,P5,P50,P95)

axisfontsize<-16
inc_plot<-ggplot(data=inc_centiles, aes(x=x_vec,y=P50)) + geom_line() + geom_line(y=P5, linetype="dotted")+ geom_line(y=P95, linetype="dotted") +
	ylim(c(0,300)) + theme_bw() +
	geom_segment(aes(x=0,xend=5,y=200,yend=200),color="dark gray") + geom_segment(aes(x=-1,xend=0,y=180,yend=180),color="dark gray") +
	geom_segment(aes(x=-2,xend=-1,y=160,yend=160),color="dark gray") + geom_segment(aes(x=-3,xend=-2,y=140,yend=140),color="dark gray") +
	geom_segment(aes(x=-4,xend=-3,y=120,yend=120),color="dark gray") + geom_segment(aes(x=-5,xend=-4,y=100,yend=100),color="dark gray") +
	geom_segment(aes(x=-6,xend=-5,y=80,yend=80),color="dark gray") + geom_segment(aes(x=-7,xend=-6,y=60,yend=60),color="dark gray") +
	geom_segment(aes(x=-8,xend=-7,y=40,yend=40),color="dark gray") + geom_segment(aes(x=-9,xend=-8,y=20,yend=20),color="dark gray") +
	 geom_segment(aes(x=-10,xend=-9,y=0,yend=0),color="dark gray") +
	geom_vline(xintercept=0,color="dark gray") + geom_vline(xintercept=5,color="dark gray") +
	theme(panel.grid.major = element_blank(), panel.grid.minor = element_blank(), panel.background = element_blank(), axis.line = element_line(colour = "black")) +
	ylab("Incidence rate (/year)") + xlab("Time (in years) relative to start of analysis window") +
	theme(text = element_text(size=axisfontsize))

###Output PDF of plot if desired
#pdf("sim_inc_plot_incr.pdf",width=8,height=5)
#inc_plot
#dev.off()
