# Supplementary material for: Estimation of delay to diagnosis and incidence in HIV using indirect evidence of infection dates
Source: BMC Med Res Methodol. 2018 Jun 27;18:65. doi: 10.1186/s12874-018-0522-x (PMC6020319; doi:10.1186/s12874-018-0522-x)
Supplement: Supplementary file 4 — Comma-separated value file containing posterior covariance matrix for parameters of model fitted to the calibration dataset (without accounting for inter-lab variation in nucleotide ambiguity proportions). (CSV 52 kb) [file 12874_2018_522_MOESM4_ESM.csv]

0.005047294	-0.004064987	-8.32E-06	-3.17E-05	1.79E-05	-3.99E-05	4.39E-05	-9.59E-05	-4.97E-05	3.30E-05	1.15E-06	1.21E-05	2.43E-05	-3.82E-05	-1.23E-05	-1.08E-05	0.000163537	-1.20E-06	1.26E-05	-4.19E-05	9.31E-05	-5.47E-05	-1.33E-05	-4.26E-05	-8.19E-07	-6.11E-06	5.13E-05	-0.003829844	0.002653094	0.001662988	-8.38E-06	0.002056976	-0.001754767	-0.000644656	-0.001043677	-0.000165352	-0.00305164	0.000139597	-0.000823403	-7.17E-05	1.58E-06	-0.000394733	0.000242153	0.000250577	0.000243501	-0.000113264	0.000255062	-0.000177073	-0.000213989	0.000102564
-0.004064987	0.011385887	-0.000202764	1.55E-05	-0.000402607	5.31E-05	4.85E-05	-0.00016265	0.000103313	-2.09E-05	3.30E-05	-9.94E-05	-6.72E-05	9.24E-05	9.88E-05	-0.000238477	-0.000129661	-3.23E-05	-2.45E-05	7.90E-06	-0.000256278	0.000111357	6.77E-06	-4.00E-05	3.07E-05	4.06E-05	-8.73E-05	-0.000368885	-0.003132587	-0.002472484	-1.02E-05	0.000567371	0.001998575	0.000342817	0.001033264	-0.00139435	0.004948078	0.001871189	0.001556813	0.000127611	4.89E-06	6.10E-05	-0.000442239	-0.000416223	0.000248029	-0.00016445	-0.000931618	0.000456143	0.000292327	-0.000247024
-8.32E-06	-0.000202764	0.002470478	-0.000271809	0.002582877	-0.000311745	-0.000144877	0.000295538	-0.000210518	-2.11E-05	-1.52E-05	1.39E-05	5.10E-05	-8.54E-06	-4.27E-05	-0.000176077	-6.60E-05	6.63E-06	4.35E-07	0.000400201	0.000110958	-1.27E-05	-7.37E-06	4.06E-05	-1.65E-05	6.91E-06	3.93E-05	0.000430616	-0.000279514	0.001066738	3.92E-06	-0.001572232	-0.000579716	-0.000143879	0.000353971	-0.001464228	0.000309404	0.000369514	4.61E-05	2.42E-06	6.11E-06	6.30E-05	0.000135753	-1.83E-05	-8.19E-05	0.000156238	-0.000412149	0.000178629	0.000133763	-0.000251009
-3.17E-05	1.55E-05	-0.000271809	0.000169221	-0.000328186	0.000193528	1.45E-05	-4.11E-05	3.14E-05	2.57E-05	1.39E-05	-2.53E-05	-1.39E-05	7.55E-06	2.10E-05	-1.07E-05	1.05E-06	-5.91E-06	-3.80E-06	-5.94E-05	8.44E-05	-4.80E-06	-1.42E-07	-1.70E-05	-5.68E-07	-6.68E-06	-1.01E-05	1.39E-05	0.000157168	-6.66E-05	2.24E-06	-0.000154272	0.000279457	-5.69E-05	-0.000117246	1.37E-05	-0.000426843	-0.000279209	2.86E-05	1.77E-05	-1.03E-06	9.54E-05	2.73E-05	2.67E-05	-6.97E-05	-4.45E-05	6.54E-05	-6.69E-05	-3.19E-06	3.08E-06
1.79E-05	-0.000402607	0.002582877	-0.000328186	0.004238683	-0.000534207	-0.000141611	0.000350084	-0.000171221	-8.23E-05	-1.67E-05	8.91E-05	2.85E-05	-3.84E-05	-6.89E-05	2.35E-05	-0.000114383	3.00E-05	3.09E-06	0.000521167	-8.02E-05	6.42E-05	-3.29E-06	6.07E-05	-1.74E-05	3.57E-05	5.13E-05	0.000576029	-0.000356887	0.000539944	2.10E-05	-0.001652932	-0.001065313	-0.000272444	5.79E-05	-0.000973524	0.000972297	0.000699331	-0.000132145	3.18E-05	1.09E-06	3.56E-05	0.000393341	-2.09E-05	-0.000231943	0.000373978	-0.00062269	-0.000186843	0.000321886	-0.000188599
-3.99E-05	5.31E-05	-0.000311745	0.000193528	-0.000534207	0.000281278	2.07E-05	-6.42E-05	4.37E-05	4.01E-05	1.65E-05	-3.68E-05	-1.40E-05	1.21E-05	2.67E-05	-3.79E-05	2.07E-05	-1.05E-05	-3.93E-06	-0.000109753	0.000102865	-2.83E-05	6.22E-07	-1.99E-05	2.11E-06	-3.09E-06	-1.04E-05	9.36E-06	0.000253736	0.000158102	-1.56E-06	-8.31E-05	0.000411091	-0.000151504	-0.000148807	-6.23E-05	-0.000699531	-0.000355401	5.69E-05	2.77E-05	-1.15E-06	0.000101358	-1.62E-05	6.04E-05	-5.30E-05	-0.00012498	8.97E-05	-6.55E-05	-1.50E-05	2.43E-05
4.39E-05	4.85E-05	-0.000144877	1.45E-05	-0.000141611	2.07E-05	0.006480794	-0.004388885	0.00591277	-0.000266741	-8.34E-05	-5.91E-05	-3.13E-05	1.98E-06	5.92E-05	-0.001124771	-0.000352372	-3.01E-05	-6.22E-05	-0.009700885	-0.000302255	0.000185865	1.85E-06	-0.000250877	9.98E-05	4.99E-05	-8.90E-05	1.50E-05	-0.001872461	-0.001938775	-7.81E-05	0.006598314	-0.001864732	0.000843893	-0.000405461	-0.0001505	-0.000374416	-0.003425527	0.001111524	0.000203075	1.70E-06	0.000245291	0.00046047	-0.000272756	-0.000644801	-0.000701684	-6.79E-06	0.000359802	0.000441202	0.000335733
-9.59E-05	-0.00016265	0.000295538	-4.11E-05	0.000350084	-6.42E-05	-0.004388885	0.007484782	-0.004837623	-0.000349903	9.26E-05	0.000459824	9.30E-05	-0.000425995	-0.000127008	0.001426279	-0.000577817	3.98E-05	3.99E-05	0.009581384	3.00E-05	0.000505783	6.32E-06	0.000231616	-9.74E-05	2.73E-05	0.000212179	-0.000690513	0.000159439	0.00116126	6.84E-05	-0.007750934	0.000782456	-0.00072438	0.001320882	-0.000313807	0.000363527	0.004852121	-0.000427947	4.16E-05	-7.27E-06	0.000561569	-0.000472585	0.00018682	0.000467403	0.00088546	0.000434036	-0.001562544	-0.00017761	-0.000300919
-4.97E-05	0.000103313	-0.000210518	3.14E-05	-0.000171221	4.37E-05	0.00591277	-0.004837623	0.009549204	-0.000150903	-1.59E-05	-0.000231335	-0.000124655	0.000156204	0.000131518	-0.000327574	2.83E-05	-3.13E-05	-5.54E-05	-0.009108255	0.000346729	-0.00020691	1.27E-05	-0.000330041	0.000147995	9.41E-05	-8.22E-05	-2.89E-05	-0.001934007	-0.000992766	-5.74E-05	0.005431764	-0.001191111	0.001476718	-0.001053648	-0.000479346	-0.001716742	-0.00382681	0.000567414	-0.000117651	-1.69E-05	0.00101319	0.000586044	-0.000375978	-0.000247307	-0.000842225	0.000392707	0.000619107	0.000542984	0.000183629
3.30E-05	-2.09E-05	-2.11E-05	2.57E-05	-8.23E-05	4.01E-05	-0.000266741	-0.000349903	-0.000150903	0.003112463	-3.55E-05	-0.0015991	-0.001403434	0.000330316	0.000643556	-0.00129889	-0.000159574	-2.57E-05	-5.76E-05	8.75E-05	0.000535513	-0.00127548	1.14E-07	-8.42E-05	0.000128129	-8.14E-06	-0.000130171	-0.000944382	0.000962093	-0.001066185	-3.08E-05	0.000735585	-0.000759085	0.000145676	6.55E-05	-0.000483101	-0.001784374	0.000786916	-0.000168565	-4.07E-06	-3.88E-06	-0.000653582	0.00058511	0.000273443	9.58E-05	-0.000193883	-0.000168636	0.000118925	0.000199594	4.19E-05
1.15E-06	3.30E-05	-1.52E-05	1.39E-05	-1.67E-05	1.65E-05	-8.34E-05	9.26E-05	-1.59E-05	-3.55E-05	0.000859476	-0.000467056	-0.000538945	0.000257965	0.000102743	-0.00067376	4.30E-05	-0.000136356	-2.67E-05	0.00014569	0.000160799	-9.48E-05	1.07E-06	-2.43E-05	1.63E-05	4.84E-05	-1.10E-05	-0.000128346	-0.000516505	-9.02E-05	1.57E-07	-0.000381283	0.00018109	-0.00014267	-0.000555319	0.000634456	0.000544282	0.000455441	0.000186142	-5.43E-05	-3.97E-06	0.000473604	-2.17E-05	0.000102587	9.46E-05	-0.00011381	7.33E-05	-1.24E-05	0.000166463	-7.98E-05
1.21E-05	-9.94E-05	1.39E-05	-2.53E-05	8.91E-05	-3.68E-05	-5.91E-05	0.000459824	-0.000231335	-0.0015991	-0.000467056	0.003009197	0.000786824	-0.001371022	-0.000911641	0.001379717	3.01E-05	0.000116548	0.000224928	0.000326503	-0.000549621	0.001146948	-2.39E-05	1.88E-05	-6.49E-05	4.68E-05	-3.82E-06	0.000520573	-0.000148011	0.001349166	4.73E-05	-0.001949346	0.000295893	-0.000631925	0.000886754	0.000404266	0.000850621	0.000788909	-0.000398894	-0.000140458	-3.32E-06	5.74E-05	-0.000140688	-0.000234434	3.97E-05	0.000743174	0.000380318	-0.000627085	-0.000220116	-6.52E-05
2.43E-05	-6.72E-05	5.10E-05	-1.39E-05	2.85E-05	-1.40E-05	-3.13E-05	9.30E-05	-0.000124655	-0.001403434	-0.000538945	0.000786824	0.002324555	-0.000402729	-0.000678757	0.000589661	0.000488661	0.000177445	3.51E-05	0.000126573	-0.000252528	0.000443936	1.66E-05	0.000146139	-0.000203053	-5.87E-05	0.000212118	0.000422578	0.000209602	-0.000210667	-6.66E-06	0.000981974	0.000840041	0.000205709	0.000597547	0.000106875	0.001092864	-0.001180313	0.00011045	0.000181844	9.59E-06	-0.000253159	-0.000541095	3.86E-05	-0.000138457	0.000246268	-0.000531754	0.000304896	-0.000252217	0.0001021
-3.82E-05	9.24E-05	-8.54E-06	7.55E-06	-3.84E-05	1.21E-05	1.98E-06	-0.000425995	0.000156204	0.000330316	0.000257965	-0.001371022	-0.000402729	0.001950972	-0.000310599	-0.000312638	-0.000452062	0.00011481	-0.000124592	-0.000216238	0.000376612	-0.000513217	4.63E-06	0.000107036	-8.20E-05	-1.10E-05	0.000302591	-0.000352407	-0.000862049	-0.000295312	-1.73E-05	-2.53E-05	-0.000801589	0.000505467	-0.000755897	-0.000183793	0.000438334	-0.000474646	0.000410862	-4.89E-05	-2.01E-06	0.000472894	0.000339798	0.000117262	3.10E-05	-0.000470308	-0.000562446	0.00011792	0.000235439	7.54E-05
-1.23E-05	9.88E-05	-4.27E-05	2.10E-05	-6.89E-05	2.67E-05	5.92E-05	-0.000127008	0.000131518	0.000643556	0.000102743	-0.000911641	-0.000678757	-0.000310599	0.001225917	-0.000386537	0.000301293	-0.000296937	-8.56E-05	-0.000178417	-2.22E-05	-0.000347349	1.06E-05	-0.000102251	0.000160715	-1.57E-05	-0.000263645	4.80E-05	0.000798147	-0.000144117	-1.29E-05	0.001598417	0.000233414	0.000487331	-0.000523233	-0.00058688	-0.001623511	-0.001252797	1.81E-05	-8.83E-05	2.77E-06	-0.000413993	0.000128436	2.04E-05	9.69E-05	-0.0002962	0.000404643	0.000372985	-1.93E-05	5.30E-05
-1.08E-05	-0.000238477	-0.000176077	-1.07E-05	2.35E-05	-3.79E-05	-0.001124771	0.001426279	-0.000327574	-0.00129889	-0.00067376	0.001379717	0.000589661	-0.000312638	-0.000386537	0.012885951	0.000702248	0.000352694	0.00011312	0.002058133	0.000538682	0.000101976	-9.25E-06	0.000134098	-4.04E-05	0.00012372	0.000262313	-0.000221737	-0.001289954	-0.001161416	3.58E-05	-0.002793736	0.003513563	0.001020614	0.000614726	0.002330542	0.000472195	-0.001115629	-0.00033754	-0.000918998	-8.70E-06	0.001175472	0.00019372	-0.000351523	-0.000101753	0.000613617	6.97E-05	-6.21E-05	0.00020447	-1.30E-05
0.000163537	-0.000129661	-6.60E-05	1.05E-06	-0.000114383	2.07E-05	-0.000352372	-0.000577817	2.83E-05	-0.000159574	4.30E-05	3.01E-05	0.000488661	-0.000452062	0.000301293	0.000702248	0.00300239	2.49E-05	0.000169213	-2.39E-05	0.000298451	-0.000745966	-6.23E-06	-4.24E-05	2.81E-05	2.15E-05	-9.27E-05	-0.000250707	-0.000405454	-0.001290182	-3.97E-05	0.002205911	0.001785863	-0.000220486	-2.11E-05	-0.000740465	0.001374741	0.000232334	0.000186402	-1.19E-05	1.77E-05	-0.001906605	0.000372156	0.000147338	-3.50E-05	0.000718732	-0.001320666	0.001229235	-7.44E-05	7.59E-05
-1.20E-06	-3.23E-05	6.63E-06	-5.91E-06	3.00E-05	-1.05E-05	-3.01E-05	3.98E-05	-3.13E-05	-2.57E-05	-0.000136356	0.000116548	0.000177445	0.00011481	-0.000296937	0.000352694	2.49E-05	0.000410736	5.89E-05	8.02E-05	0.000106774	3.72E-05	-1.05E-05	2.56E-05	-3.33E-05	-4.36E-06	8.00E-05	-0.000113944	-0.000380355	-0.000505788	-3.35E-06	-0.000639385	-4.29E-06	-0.000359987	0.000242093	-9.17E-05	0.000868465	0.000695096	0.000128065	0.000105655	1.49E-06	-0.000110967	3.16E-05	-2.02E-05	-2.80E-05	1.98E-05	-0.000261733	-9.58E-05	2.39E-05	-8.11E-06
1.26E-05	-2.45E-05	4.35E-07	-3.80E-06	3.09E-06	-3.93E-06	-6.22E-05	3.99E-05	-5.54E-05	-5.76E-05	-2.67E-05	0.000224928	3.51E-05	-0.000124592	-8.56E-05	0.00011312	0.000169213	5.89E-05	0.000115098	0.000100786	5.52E-05	3.22E-05	-1.55E-05	-5.51E-06	-8.04E-06	2.62E-05	1.95E-05	-8.06E-05	-4.61E-05	1.32E-05	1.56E-06	-0.000304965	0.000153268	-0.000216471	9.91E-05	-0.000129178	0.000105798	1.67E-05	-7.68E-05	-6.95E-06	1.49E-06	-0.000248768	8.80E-05	2.27E-05	1.60E-05	0.000135922	-0.000100614	9.62E-05	-7.15E-05	-1.57E-05
-4.19E-05	7.90E-06	0.000400201	-5.94E-05	0.000521167	-0.000109753	-0.009700885	0.009581384	-0.009108255	8.75E-05	0.00014569	0.000326503	0.000126573	-0.000216238	-0.000178417	0.002058133	-2.39E-05	8.02E-05	0.000100786	0.019949473	0.000421878	0.000121497	1.60E-06	0.000395695	-0.000174489	4.30E-05	0.000302134	-0.000266203	0.00241127	0.003193147	0.000121735	-0.010688291	0.002113931	-0.001851735	0.00170971	1.01E-05	-0.000211739	0.008680953	-0.001520119	-7.78E-05	-3.61E-06	2.13E-05	-0.000729818	0.000253457	0.000909274	0.001242021	-0.000186216	-0.001592946	-0.000615855	-0.000526494
9.31E-05	-0.000256278	0.000110958	8.44E-05	-8.02E-05	0.000102865	-0.000302255	3.00E-05	0.000346729	0.000535513	0.000160799	-0.000549621	-0.000252528	0.000376612	-2.22E-05	0.000538682	0.000298451	0.000106774	5.52E-05	0.000421878	0.030398139	-0.003762017	4.14E-05	-0.002023974	0.000414469	-0.000117319	5.57E-05	-0.002628267	-0.01211478	-0.009008851	0.000662192	-0.094635646	-0.012637316	-0.019378991	-0.016596719	-0.025470148	-0.00435857	-0.015885932	0.001969457	0.001086565	-7.12E-05	0.010990496	0.000790719	0.002382413	0.00171077	0.002841212	0.001179404	0.000348554	0.001253924	0.001166937
-5.47E-05	0.000111357	-1.27E-05	-4.80E-06	6.42E-05	-2.83E-05	0.000185865	0.000505783	-0.00020691	-0.00127548	-9.48E-05	0.001146948	0.000443936	-0.000513217	-0.000347349	0.000101976	-0.000745966	3.72E-05	3.22E-05	0.000121497	-0.003762017	0.004278046	-1.66E-05	0.000159817	-0.000466821	-5.75E-05	0.000115558	0.00085067	0.001950599	0.002133116	-6.30E-05	0.010246547	0.000717839	0.002016173	0.002358305	0.003330775	-0.000277582	-0.000381618	-0.000819296	-0.000895162	7.22E-05	-0.010825221	-0.001837405	-0.002763716	-0.001693781	-0.0020493	-0.000476787	-0.002428446	4.15E-05	2.83E-05
-1.33E-05	6.77E-06	-7.37E-06	-1.42E-07	-3.29E-06	6.22E-07	1.85E-06	6.32E-06	1.27E-05	1.14E-07	1.07E-06	-2.39E-05	1.66E-05	4.63E-06	1.06E-05	-9.25E-06	-6.23E-06	-1.05E-05	-1.55E-05	1.60E-06	4.14E-05	-1.66E-05	6.21E-05	3.50E-06	9.96E-07	1.05E-05	4.52E-06	7.29E-05	-0.000233295	-3.00E-05	2.48E-06	-0.000188202	-2.43E-05	2.74E-05	2.02E-05	-8.89E-05	3.44E-05	-0.000130722	-4.10E-06	1.02E-06	-2.04E-06	0.000154655	2.81E-06	-3.84E-05	-1.14E-05	-4.69E-05	4.06E-05	2.23E-05	4.53E-05	7.76E-06
-4.26E-05	-4.00E-05	4.06E-05	-1.70E-05	6.07E-05	-1.99E-05	-0.000250877	0.000231616	-0.000330041	-8.42E-05	-2.43E-05	1.88E-05	0.000146139	0.000107036	-0.000102251	0.000134098	-4.24E-05	2.56E-05	-5.51E-06	0.000395695	-0.002023974	0.000159817	3.50E-06	0.001185352	-0.000250471	-3.06E-05	0.000434518	0.000345022	-2.14E-05	0.000755631	-4.97E-05	0.005838881	0.000759829	0.001326961	0.001243372	0.001997878	0.000782905	0.001777412	0.000320627	0.00011935	1.41E-05	-0.000854032	-0.000216899	-0.000127784	-6.18E-05	-4.92E-05	-0.000260737	-1.61E-05	-0.000369782	-0.000275245
-8.19E-07	3.07E-05	-1.65E-05	-5.68E-07	-1.74E-05	2.11E-06	9.98E-05	-9.74E-05	0.000147995	0.000128129	1.63E-05	-6.49E-05	-0.000203053	-8.20E-05	0.000160715	-4.04E-05	2.81E-05	-3.33E-05	-8.04E-06	-0.000174489	0.000414469	-0.000466821	9.96E-07	-0.000250471	0.000210969	3.05E-05	-0.000188724	-6.69E-05	3.87E-05	-0.000146612	9.58E-06	-0.001116273	-7.36E-05	-0.000243281	-0.000273722	-0.000606057	-0.00040254	-0.000202834	-1.76E-05	2.20E-05	-1.25E-05	0.001428367	0.000263036	0.00033889	0.000185117	0.000208206	0.000315632	0.000370056	3.74E-05	-1.32E-05
-6.11E-06	4.06E-05	6.91E-06	-6.68E-06	3.57E-05	-3.09E-06	4.99E-05	2.73E-05	9.41E-05	-8.14E-06	4.84E-05	4.68E-05	-5.87E-05	-1.10E-05	-1.57E-05	0.00012372	2.15E-05	-4.36E-06	2.62E-05	4.30E-05	-0.000117319	-5.75E-05	1.05E-05	-3.06E-05	3.05E-05	0.002357986	0.001397489	-0.000445877	-0.000720269	-0.000681033	2.29E-06	4.17E-05	0.000939781	0.000344568	0.000164599	0.000107492	0.001946074	-0.001560941	0.000260756	0.000176877	-6.38E-06	0.000581402	-6.41E-05	8.19E-06	0.000206868	-0.000582193	-0.000348141	0.000578978	-9.40E-05	-0.000154051
5.13E-05	-8.73E-05	3.93E-05	-1.01E-05	5.13E-05	-1.04E-05	-8.90E-05	0.000212179	-8.22E-05	-0.000130171	-1.10E-05	-3.82E-06	0.000212118	0.000302591	-0.000263645	0.000262313	-9.27E-05	8.00E-05	1.95E-05	0.000302134	5.57E-05	0.000115558	4.52E-06	0.000434518	-0.000188724	0.001397489	0.003063211	0.000922122	-0.000815226	-8.65E-05	4.36E-05	-0.002351782	-8.84E-05	0.000117031	0.000727303	-0.000597159	0.002260626	-0.000487714	0.000275652	0.000343661	5.67E-07	-5.39E-05	-8.33E-05	-0.000144402	0.000168874	-0.000309442	-0.000477448	-5.86E-05	9.11E-05	-0.000128008
-0.003829844	-0.000368885	0.000430616	1.39E-05	0.000576029	9.36E-06	1.50E-05	-0.000690513	-2.89E-05	-0.000944382	-0.000128346	0.000520573	0.000422578	-0.000352407	4.80E-05	-0.000221737	-0.000250707	-0.000113944	-8.06E-05	-0.000266203	-0.002628267	0.00085067	7.29E-05	0.000345022	-6.69E-05	-0.000445877	0.000922122	0.107101692	0.000203841	0.002360676	6.76E-05	-0.002903506	0.006183953	0.002266339	0.00365167	-0.006975989	-0.001283523	0.002722519	0.000272657	0.000776007	-3.69E-05	0.001669574	-0.002355543	-0.000679367	7.26E-05	0.002690972	0.001354588	0.002488189	0.000122633	-0.001574319
0.002653094	-0.003132587	-0.000279514	0.000157168	-0.000356887	0.000253736	-0.001872461	0.000159439	-0.001934007	0.000962093	-0.000516505	-0.000148011	0.000209602	-0.000862049	0.000798147	-0.001289954	-0.000405454	-0.000380355	-4.61E-05	0.00241127	-0.01211478	0.001950599	-0.000233295	-2.14E-05	3.87E-05	-0.000720269	-0.000815226	0.000203841	0.629963559	0.103916899	-0.000821702	0.019961349	-0.036316433	0.014748	-0.07415652	-0.043952368	-0.173879122	-0.056618549	-0.067872565	-0.01312578	0.000169717	-0.003497122	0.005988331	-0.002916746	0.007901496	0.005191614	0.013570531	-0.001210863	-0.047266551	-0.004983245
0.001662988	-0.002472484	0.001066738	-6.66E-05	0.000539944	0.000158102	-0.001938775	0.00116126	-0.000992766	-0.001066185	-9.02E-05	0.001349166	-0.000210667	-0.000295312	-0.000144117	-0.001161416	-0.001290182	-0.000505788	1.32E-05	0.003193147	-0.009008851	0.002133116	-3.00E-05	0.000755631	-0.000146612	-0.000681033	-8.65E-05	0.002360676	0.103916899	0.482041748	0.000641885	-0.039108467	-0.107980429	0.006164564	-0.03411536	-0.042588065	-0.194951374	-0.019168076	-0.013553791	-0.053766221	-7.90E-05	0.012010163	0.012033118	-0.00340728	0.002645491	0.003143974	0.023342369	-0.001285213	-0.003474227	-0.032609571
-8.38E-06	-1.02E-05	3.92E-06	2.24E-06	2.10E-05	-1.56E-06	-7.81E-05	6.84E-05	-5.74E-05	-3.08E-05	1.57E-07	4.73E-05	-6.66E-06	-1.73E-05	-1.29E-05	3.58E-05	-3.97E-05	-3.35E-06	1.56E-06	0.000121735	0.000662192	-6.30E-05	2.48E-06	-4.97E-05	9.58E-06	2.29E-06	4.36E-05	6.76E-05	-0.000821702	0.000641885	0.000353974	-0.014989632	0.000524152	5.33E-05	0.000215549	8.74E-05	0.000597807	0.000591208	0.000228447	5.82E-05	-3.44E-05	0.001537204	-0.000105592	-1.04E-05	2.09E-05	-2.64E-05	-0.000253101	-0.000116743	0.000220991	-2.98E-05
0.002056976	0.000567371	-0.001572232	-0.000154272	-0.001652932	-8.31E-05	0.006598314	-0.007750934	0.005431764	0.000735585	-0.000381283	-0.001949346	0.000981974	-2.53E-05	0.001598417	-0.002793736	0.002205911	-0.000639385	-0.000304965	-0.010688291	-0.094635646	0.010246547	-0.000188202	0.005838881	-0.001116273	4.17E-05	-0.002351782	-0.002903506	0.019961349	-0.039108467	-0.014989632	1.368122202	-0.027972529	0.025444284	-0.027113059	0.024290792	-0.05489025	0.00238988	-0.004138282	-0.001768309	0.001435715	-0.152405736	0.007355829	0.002754405	0.00218551	0.001123917	0.010963605	0.008181299	-0.015751577	-0.00018561
-0.001754767	0.001998575	-0.000579716	0.000279457	-0.001065313	0.000411091	-0.001864732	0.000782456	-0.001191111	-0.000759085	0.00018109	0.000295893	0.000840041	-0.000801589	0.000233414	0.003513563	0.001785863	-4.29E-06	0.000153268	0.002113931	-0.012637316	0.000717839	-2.43E-05	0.000759829	-7.36E-05	0.000939781	-8.84E-05	0.006183953	-0.036316433	-0.107980429	0.000524152	-0.027972529	0.416795878	0.020626088	-0.005514165	0.015013845	-0.009660262	-0.062305448	0.001281948	0.009959996	-2.62E-05	0.005112993	-0.041912401	-0.000779587	0.003064639	-0.00477404	0.003236815	0.007321126	0.005326572	0.006968893
-0.000644656	0.000342817	-0.000143879	-5.69E-05	-0.000272444	-0.000151504	0.000843893	-0.00072438	0.001476718	0.000145676	-0.00014267	-0.000631925	0.000205709	0.000505467	0.000487331	0.001020614	-0.000220486	-0.000359987	-0.000216471	-0.001851735	-0.019378991	0.002016173	2.74E-05	0.001326961	-0.000243281	0.000344568	0.000117031	0.002266339	0.014748	0.006164564	5.33E-05	0.025444284	0.020626088	0.267720388	-0.013864606	0.00682291	-0.006695948	-0.040817804	-0.000100713	-0.001125827	-4.33E-05	-0.00010415	-0.001695592	-0.025469979	-0.000422631	-0.001584119	-0.00129058	-0.00077516	0.000235371	-0.000414615
-0.001043677	0.001033264	0.000353971	-0.000117246	5.79E-05	-0.000148807	-0.000405461	0.001320882	-0.001053648	6.55E-05	-0.000555319	0.000886754	0.000597547	-0.000755897	-0.000523233	0.000614726	-2.11E-05	0.000242093	9.91E-05	0.00170971	-0.016596719	0.002358305	2.02E-05	0.001243372	-0.000273722	0.000164599	0.000727303	0.00365167	-0.07415652	-0.03411536	0.000215549	-0.027113059	-0.005514165	-0.013864606	0.205628665	0.028537184	0.049374328	0.028378334	0.012805297	0.005684271	7.52E-05	-0.004419667	-0.000605022	0.001207091	-0.025293822	-0.005061698	-0.007591281	0.002138759	0.00573403	0.002777574
-0.000165352	-0.00139435	-0.001464228	1.37E-05	-0.000973524	-6.23E-05	-0.0001505	-0.000313807	-0.000479346	-0.000483101	0.000634456	0.000404266	0.000106875	-0.000183793	-0.00058688	0.002330542	-0.000740465	-9.17E-05	-0.000129178	1.01E-05	-0.025470148	0.003330775	-8.89E-05	0.001997878	-0.000606057	0.000107492	-0.000597159	-0.006975989	-0.043952368	-0.042588065	8.74E-05	0.024290792	0.015013845	0.00682291	0.028537184	0.496000645	0.053352703	0.035721724	0.006377349	0.012509832	7.42E-05	-0.016381823	-0.004909234	-0.003257706	-0.003046005	-0.064912373	-0.007650448	0.001623958	0.004486983	0.002132783
-0.00305164	0.004948078	0.000309404	-0.000426843	0.000972297	-0.000699531	-0.000374416	0.000363527	-0.001716742	-0.001784374	0.000544282	0.000850621	0.001092864	0.000438334	-0.001623511	0.000472195	0.001374741	0.000868465	0.000105798	-0.000211739	-0.00435857	-0.000277582	3.44E-05	0.000782905	-0.00040254	0.001946074	0.002260626	-0.001283523	-0.173879122	-0.194951374	0.000597807	-0.05489025	-0.009660262	-0.006695948	0.049374328	0.053352703	0.629911207	0.047632302	0.020313931	0.035031821	-0.000180391	0.006439558	-0.002547235	0.000317803	-0.002130625	-0.005678248	-0.076632323	-0.002607815	0.013130809	0.007754308
0.000139597	0.001871189	0.000369514	-0.000279209	0.000699331	-0.000355401	-0.003425527	0.004852121	-0.00382681	0.000786916	0.000455441	0.000788909	-0.001180313	-0.000474646	-0.001252797	-0.001115629	0.000232334	0.000695096	1.67E-05	0.008680953	-0.015885932	-0.000381618	-0.000130722	0.001777412	-0.000202834	-0.001560941	-0.000487714	0.002722519	-0.056618549	-0.019168076	0.000591208	0.00238988	-0.062305448	-0.040817804	0.028378334	0.035721724	0.047632302	0.768345731	-0.001550399	0.000813054	-0.000190659	0.010396476	0.011028764	0.002111022	0.003621046	-0.004251631	-0.002817345	-0.069718645	0.011518951	0.005558732
-0.000823403	0.001556813	4.61E-05	2.86E-05	-0.000132145	5.69E-05	0.001111524	-0.000427947	0.000567414	-0.000168565	0.000186142	-0.000398894	0.00011045	0.000410862	1.81E-05	-0.00033754	0.000186402	0.000128065	-7.68E-05	-0.001520119	0.001969457	-0.000819296	-4.10E-06	0.000320627	-1.76E-05	0.000260756	0.000275652	0.000272657	-0.067872565	-0.013553791	0.000228447	-0.004138282	0.001281948	-0.000100713	0.012805297	0.006377349	0.020313931	-0.001550399	0.086215881	0.015624493	-5.73E-05	-0.003575055	-0.006935749	0.000486482	-0.014857323	-0.01909162	-0.024084194	0.005175736	0.001451624	0.000542595
-7.17E-05	0.000127611	2.42E-06	1.77E-05	3.18E-05	2.77E-05	0.000203075	4.16E-05	-0.000117651	-4.07E-06	-5.43E-05	-0.000140458	0.000181844	-4.89E-05	-8.83E-05	-0.000918998	-1.19E-05	0.000105655	-6.95E-06	-7.78E-05	0.001086565	-0.000895162	1.02E-06	0.00011935	2.20E-05	0.000176877	0.000343661	0.000776007	-0.01312578	-0.053766221	5.82E-05	-0.001768309	0.009959996	-0.001125827	0.005684271	0.012509832	0.035031821	0.000813054	0.015624493	0.05624059	8.02E-07	-0.001127665	-0.009273345	0.000574121	-0.005739661	-0.013785498	-0.033393787	0.001206986	0.001219044	0.000632806
1.58E-06	4.89E-06	6.11E-06	-1.03E-06	1.09E-06	-1.15E-06	1.70E-06	-7.27E-06	-1.69E-05	-3.88E-06	-3.97E-06	-3.32E-06	9.59E-06	-2.01E-06	2.77E-06	-8.70E-06	1.77E-05	1.49E-06	1.49E-06	-3.61E-06	-7.12E-05	7.22E-05	-2.04E-06	1.41E-05	-1.25E-05	-6.38E-06	5.67E-07	-3.69E-05	0.000169717	-7.90E-05	-3.44E-05	0.001435715	-2.62E-05	-4.33E-05	7.52E-05	7.42E-05	-0.000180391	-0.000190659	-5.73E-05	8.02E-07	3.66E-05	-0.001464271	4.26E-05	6.41E-05	-8.75E-05	1.47E-05	9.67E-05	0.000126608	-4.70E-05	1.56E-06
-0.000394733	6.10E-05	6.30E-05	9.54E-05	3.56E-05	0.000101358	0.000245291	0.000561569	0.00101319	-0.000653582	0.000473604	5.74E-05	-0.000253159	0.000472894	-0.000413993	0.001175472	-0.001906605	-0.000110967	-0.000248768	2.13E-05	0.010990496	-0.010825221	0.000154655	-0.000854032	0.001428367	0.000581402	-5.39E-05	0.001669574	-0.003497122	0.012010163	0.001537204	-0.152405736	0.005112993	-0.00010415	-0.004419667	-0.016381823	0.006439558	0.010396476	-0.003575055	-0.001127665	-0.001464271	0.169976798	-0.000927788	0.001563098	-0.003694639	-0.00550747	-0.009437621	-0.005931117	0.003464773	-0.0013644
0.000242153	-0.000442239	0.000135753	2.73E-05	0.000393341	-1.62E-05	0.00046047	-0.000472585	0.000586044	0.00058511	-2.17E-05	-0.000140688	-0.000541095	0.000339798	0.000128436	0.00019372	0.000372156	3.16E-05	8.80E-05	-0.000729818	0.000790719	-0.001837405	2.81E-06	-0.000216899	0.000263036	-6.41E-05	-8.33E-05	-0.002355543	0.005988331	0.012033118	-0.000105592	0.007355829	-0.041912401	-0.001695592	-0.000605022	-0.004909234	-0.002547235	0.011028764	-0.006935749	-0.009273345	4.26E-05	-0.000927788	0.038393653	0.002275812	-0.000445272	0.005390387	0.002099565	-0.008632893	-0.001062173	-0.000440801
0.000250577	-0.000416223	-1.83E-05	2.67E-05	-2.09E-05	6.04E-05	-0.000272756	0.00018682	-0.000375978	0.000273443	0.000102587	-0.000234434	3.86E-05	0.000117262	2.04E-05	-0.000351523	0.000147338	-2.02E-05	2.27E-05	0.000253457	0.002382413	-0.002763716	-3.84E-05	-0.000127784	0.00033889	8.19E-06	-0.000144402	-0.000679367	-0.002916746	-0.00340728	-1.04E-05	0.002754405	-0.000779587	-0.025469979	0.001207091	-0.003257706	0.000317803	0.002111022	0.000486482	0.000574121	6.41E-05	0.001563098	0.002275812	0.029934673	-0.001688034	0.001175985	0.003242695	-0.001314451	-0.000345487	0.000161955
0.000243501	0.000248029	-8.19E-05	-6.97E-05	-0.000231943	-5.30E-05	-0.000644801	0.000467403	-0.000247307	9.58E-05	9.46E-05	3.97E-05	-0.000138457	3.10E-05	9.69E-05	-0.000101753	-3.50E-05	-2.80E-05	1.60E-05	0.000909274	0.00171077	-0.001693781	-1.14E-05	-6.18E-05	0.000185117	0.000206868	0.000168874	7.26E-05	0.007901496	0.002645491	2.09E-05	0.00218551	0.003064639	-0.000422631	-0.025293822	-0.003046005	-0.002130625	0.003621046	-0.014857323	-0.005739661	-8.75E-05	-0.003694639	-0.000445272	-0.001688034	0.03101527	0.006936749	0.008746271	0.00114572	-0.000430409	-0.000372393
-0.000113264	-0.00016445	0.000156238	-4.45E-05	0.000373978	-0.00012498	-0.000701684	0.00088546	-0.000842225	-0.000193883	-0.00011381	0.000743174	0.000246268	-0.000470308	-0.0002962	0.000613617	0.000718732	1.98E-05	0.000135922	0.001242021	0.002841212	-0.0020493	-4.69E-05	-4.92E-05	0.000208206	-0.000582193	-0.000309442	0.002690972	0.005191614	0.003143974	-2.64E-05	0.001123917	-0.00477404	-0.001584119	-0.005061698	-0.064912373	-0.005678248	-0.004251631	-0.01909162	-0.013785498	1.47E-05	-0.00550747	0.005390387	0.001175985	0.006936749	0.081715619	0.012830192	0.001697421	-0.000475828	-0.00024991
0.000255062	-0.000931618	-0.000412149	6.54E-05	-0.00062269	8.97E-05	-6.79E-06	0.000434036	0.000392707	-0.000168636	7.33E-05	0.000380318	-0.000531754	-0.000562446	0.000404643	6.97E-05	-0.001320666	-0.000261733	-0.000100614	-0.000186216	0.001179404	-0.000476787	4.06E-05	-0.000260737	0.000315632	-0.000348141	-0.000477448	0.001354588	0.013570531	0.023342369	-0.000253101	0.010963605	0.003236815	-0.00129058	-0.007591281	-0.007650448	-0.076632323	-0.002817345	-0.024084194	-0.033393787	9.67E-05	-0.009437621	0.002099565	0.003242695	0.008746271	0.012830192	0.08124166	0.002097052	-0.000515597	0.00130306
-0.000177073	0.000456143	0.000178629	-6.69E-05	-0.000186843	-6.55E-05	0.000359802	-0.001562544	0.000619107	0.000118925	-1.24E-05	-0.000627085	0.000304896	0.00011792	0.000372985	-6.21E-05	0.001229235	-9.58E-05	9.62E-05	-0.001592946	0.000348554	-0.002428446	2.23E-05	-1.61E-05	0.000370056	0.000578978	-5.86E-05	0.002488189	-0.001210863	-0.001285213	-0.000116743	0.008181299	0.007321126	-0.00077516	0.002138759	0.001623958	-0.002607815	-0.069718645	0.005175736	0.001206986	0.000126608	-0.005931117	-0.008632893	-0.001314451	0.00114572	0.001697421	0.002097052	0.094247717	-0.001609473	-0.00124281
-0.000213989	0.000292327	0.000133763	-3.19E-06	0.000321886	-1.50E-05	0.000441202	-0.00017761	0.000542984	0.000199594	0.000166463	-0.000220116	-0.000252217	0.000235439	-1.93E-05	0.00020447	-7.44E-05	2.39E-05	-7.15E-05	-0.000615855	0.001253924	4.15E-05	4.53E-05	-0.000369782	3.74E-05	-9.40E-05	9.11E-05	0.000122633	-0.047266551	-0.003474227	0.000220991	-0.015751577	0.005326572	0.000235371	0.00573403	0.004486983	0.013130809	0.011518951	0.001451624	0.001219044	-4.70E-05	0.003464773	-0.001062173	-0.000345487	-0.000430409	-0.000475828	-0.000515597	-0.001609473	0.025041165	0.003577565
0.000102564	-0.000247024	-0.000251009	3.08E-06	-0.000188599	2.43E-05	0.000335733	-0.000300919	0.000183629	4.19E-05	-7.98E-05	-6.52E-05	0.0001021	7.54E-05	5.30E-05	-1.30E-05	7.59E-05	-8.11E-06	-1.57E-05	-0.000526494	0.001166937	2.83E-05	7.76E-06	-0.000275245	-1.32E-05	-0.000154051	-0.000128008	-0.001574319	-0.004983245	-0.032609571	-2.98E-05	-0.00018561	0.006968893	-0.000414615	0.002777574	0.002132783	0.007754308	0.005558732	0.000542595	0.000632806	1.56E-06	-0.0013644	-0.000440801	0.000161955	-0.000372393	-0.00024991	0.00130306	-0.00124281	0.003577565	0.018398028
-3.18E-08	-6.46E-07	-5.55E-06	1.50E-06	-5.61E-06	2.16E-06	1.23E-05	-7.12E-06	1.22E-05	-1.35E-06	-3.63E-06	-1.08E-06	4.28E-06	4.26E-06	-7.37E-07	1.27E-06	1.57E-06	1.49E-06	5.43E-07	-1.50E-05	-4.57E-05	1.05E-06	-5.11E-07	2.71E-05	-5.11E-06	-2.48E-06	1.82E-06	-1.89E-06	7.43E-05	-8.66E-05	-2.91E-05	0.001264758	6.44E-05	-6.63E-06	-2.35E-05	-3.79E-05	-0.000104777	-9.64E-05	-3.03E-05	2.38E-06	9.99E-07	-7.54E-05	2.96E-06	1.15E-05	-2.22E-06	1.70E-05	3.62E-05	4.51E-06	-5.92E-05	4.28E-05
4.86E-05	-1.36E-05	0.000201442	-4.22E-06	0.000167412	-3.67E-05	-0.000940181	0.000757987	-0.001152137	8.25E-06	0.000244251	4.05E-05	-0.000230847	0.000116444	-0.000232603	1.66E-05	-4.95E-05	5.63E-05	8.98E-06	0.001250549	0.007220849	-0.000475679	7.83E-06	-0.003470286	0.000647267	-0.000169822	-9.84E-06	-0.000305226	-0.000980402	0.00237297	0.001262405	-0.112131286	0.002593098	0.000193242	0.00284892	-0.000819075	0.006348818	0.000906563	-0.000564653	-0.001450278	-6.14E-05	0.006815569	0.000275728	-0.001331129	0.000578051	0.000481785	0.000144864	7.28E-05	0.00306814	-0.001491368
5.92E-05	9.57E-06	-0.000131923	2.15E-05	-5.33E-05	1.14E-05	0.000358032	-0.000383976	0.000464365	-1.96E-05	0.000105753	-0.000121836	1.34E-05	-9.86E-05	3.16E-05	-0.00073966	4.70E-06	-3.93E-05	-5.05E-05	-0.000626479	0.001018783	1.93E-05	-1.50E-05	-0.000722659	0.000153626	-0.000140074	-0.000241642	-5.82E-05	0.004846571	0.006613457	2.11E-06	0.005635127	-0.032794393	-0.000735576	-0.001756364	-0.002333229	0.00140505	0.000869319	-0.000882586	0.000147868	-4.54E-07	0.000229686	0.002360096	-5.99E-05	-0.000149683	0.00038176	-0.000662177	0.000397896	-0.002565773	-0.0042804
-9.95E-05	0.000209033	1.45E-05	1.04E-05	3.80E-05	7.85E-06	-0.000307507	0.000131224	-0.000407989	-6.43E-05	4.68E-05	0.000161226	-7.05E-05	-0.000105643	-6.05E-05	-7.19E-05	9.76E-06	-4.83E-05	6.23E-05	0.000571156	0.001088732	0.000167073	8.15E-06	-0.00073897	9.00E-05	-5.32E-05	-0.000156195	0.000375391	0.001792043	-0.001215611	-7.50E-06	0.001630684	-0.001638184	-0.020433888	0.000100766	-0.000818812	0.001140794	0.004074742	-0.000776672	-0.000752595	2.68E-07	-0.000373461	0.000401474	0.00067613	0.000257256	-0.000212869	0.000468548	3.71E-05	-0.000232859	0.000177755
-1.61E-05	4.10E-05	0.000116756	-3.94E-05	8.74E-05	-2.60E-05	0.000194214	-0.000147972	0.000140452	-3.67E-05	-6.41E-05	-6.52E-05	-3.34E-05	0.000109513	-6.48E-05	9.86E-05	-8.77E-05	3.72E-05	-1.97E-05	-0.000389964	0.000614471	-2.37E-05	1.52E-05	-0.00038959	7.68E-05	-3.62E-05	-1.54E-06	0.000876177	0.005391227	0.0011664	-2.23E-05	0.002819383	-0.001173719	0.00072387	-0.013990681	-0.001053907	-0.001174171	-0.005879158	-0.000904354	0.000267335	-1.61E-05	0.000696243	-0.000119305	-2.04E-06	0.00066919	-0.000243261	-0.000860344	0.000786242	-0.002481505	-0.001810125
3.98E-06	0.00017023	0.000158724	-2.04E-05	2.83E-05	-2.36E-05	0.000180423	-0.000305507	0.000321693	0.000120258	-9.04E-05	9.13E-05	-0.000167787	1.04E-05	-5.22E-05	-0.000290299	-1.15E-05	5.66E-05	3.74E-05	-0.000450986	0.00239929	-6.14E-05	4.27E-06	-0.000882372	0.000131438	4.45E-05	0.000239877	7.43E-05	-0.00147893	0.002693951	4.04E-05	-0.002030361	0.000162697	-0.001781797	-0.001838142	-0.034997697	-0.003256432	-0.002802203	3.64E-06	-0.000562889	-2.21E-05	0.002051733	0.000703068	-0.000275648	8.02E-05	0.002712988	-0.000950656	-0.00158736	-0.001849152	-0.002225092
0.000148889	9.97E-05	-0.000131691	8.03E-05	-0.000316054	0.000115263	0.000385157	-0.00037499	0.000816431	0.000245914	1.01E-05	-7.43E-05	-0.000283118	-0.00014943	0.000305311	-0.000148959	0.000367099	-0.000103715	6.94E-05	-0.00055172	-3.28E-05	-0.000338815	-3.07E-05	-0.000311188	0.000175644	-7.32E-05	-0.000252818	0.001410357	0.014544074	0.010027729	-0.00013644	0.009967249	0.003231349	0.003007194	-0.003890369	-0.005194329	-0.04553028	-0.013033279	-0.00252109	-0.001464334	1.77E-05	-0.000605467	0.000851718	0.000534321	0.000125949	0.000861784	0.002556422	0.001529363	-0.007191574	-0.006957272
0.000350483	-0.000263897	-0.000178372	4.53E-05	-0.000360072	9.04E-05	0.001013379	-0.000963481	0.001043153	-0.000121776	-1.73E-05	2.27E-05	2.05E-05	-0.00033163	0.000350189	-0.000299029	8.88E-05	-0.000178457	3.34E-08	-0.001827443	0.001351665	0.000182744	2.05E-05	-0.00089638	0.000148386	-8.69E-06	-0.000150671	-0.000939278	0.012089632	0.001221593	-0.000149956	0.005705872	0.000778157	0.002211665	-0.003933237	-0.003874695	-0.007791967	-0.067477193	-0.000458822	0.000785961	-5.31E-06	-0.002134302	-0.000516541	-0.000554176	-0.0002417	-0.000251083	-5.92E-06	0.002297709	-0.003905499	-0.001231826
5.69E-05	-2.07E-05	-4.49E-05	2.04E-05	-0.000132077	3.41E-05	-0.000278982	7.78E-05	-0.000245601	3.07E-05	-9.05E-05	7.90E-05	7.97E-05	-3.74E-05	-1.38E-05	-9.13E-05	6.49E-05	-1.38E-06	1.13E-05	0.000242032	-0.000356296	-5.21E-05	-3.64E-06	8.61E-05	-3.69E-06	-2.99E-05	-6.31E-06	-5.20E-05	0.00991405	0.000926294	-7.95E-05	0.003895443	-0.000180051	-0.000624365	-0.001520454	-0.000711422	-0.003637358	-0.001674815	-0.008865113	-0.001539492	5.98E-06	0.000359318	0.001256124	0.000296473	0.001555624	0.001808435	0.002648765	-0.000365448	-0.004673886	-0.000589531
-0.000119496	0.000157208	2.04E-05	-2.07E-06	1.78E-05	-1.22E-05	0.000103722	-6.68E-06	0.000181745	-2.57E-05	-1.31E-05	0.000101703	-7.18E-05	-1.71E-05	-2.65E-05	0.000110821	-3.51E-05	1.23E-05	1.30E-05	-0.000153763	-0.000280998	7.88E-05	4.89E-06	3.31E-05	-1.04E-05	3.53E-05	-1.84E-05	0.000107938	0.001944826	0.006675576	-6.25E-06	0.000173774	-0.001466864	-0.000131144	-0.001203996	-0.001468545	-0.003096041	-0.000507381	-0.001948158	-0.006959016	-5.31E-06	0.000668169	0.001394816	7.95E-05	0.000994003	0.001984681	0.003390356	0.000173156	-0.000933512	-0.003109185
8.28E-07	1.33E-07	1.05E-06	-1.59E-07	1.49E-06	-4.01E-07	1.36E-06	-1.58E-06	3.85E-06	2.20E-06	2.26E-06	-2.88E-06	-4.45E-06	1.95E-06	-3.26E-07	-1.40E-06	-1.38E-06	-2.49E-07	-5.94E-07	-3.94E-06	1.60E-05	-9.68E-06	4.98E-07	-8.53E-06	4.83E-06	2.12E-06	-1.81E-06	3.66E-06	-4.66E-05	7.58E-06	5.63E-06	-0.000247526	-2.00E-05	1.03E-05	-5.32E-06	-2.01E-05	4.25E-05	3.74E-05	6.99E-06	1.56E-06	-4.87E-06	0.00020643	1.11E-06	-1.77E-05	9.06E-06	-1.15E-05	-1.37E-05	-1.64E-05	1.98E-05	-4.12E-06
-1.14E-05	-6.50E-05	-6.80E-05	-5.91E-06	-1.17E-05	-7.80E-06	-0.000177668	0.000109181	-0.000207164	-4.73E-05	-0.000138128	0.000202336	0.000109635	-0.000263779	8.26E-05	7.10E-06	0.000132002	3.25E-05	9.27E-05	0.000438153	-0.001827417	0.001399248	-3.59E-05	0.000682332	-0.000561526	-1.05E-05	-9.79E-06	-0.000348512	0.001731048	-0.00101925	-0.00026248	0.025363443	7.96E-05	-0.001049674	-0.000786048	0.00245817	-0.000938313	-0.000135174	0.000933413	0.000753351	0.000207438	-0.021491665	-0.000359238	0.000297943	0.000510315	0.000573061	0.000766285	0.000885714	-0.001306819	0.000503555
5.86E-05	-6.18E-05	5.01E-05	-2.01E-05	3.57E-05	-2.04E-05	-0.000218548	0.000140542	-0.000226971	-4.59E-05	-2.40E-05	-1.43E-05	0.000107117	3.94E-05	-3.14E-05	0.000108293	1.17E-05	2.00E-05	-2.69E-05	0.000325772	-0.000271976	0.000248703	6.73E-06	0.000208418	-0.000127346	-1.88E-05	6.13E-05	0.000353561	-0.002030214	-0.001537578	1.84E-05	-0.002225241	0.007622131	0.000231162	0.000413006	0.001329738	0.000589659	-0.00098782	0.00126472	0.001158851	-4.54E-06	-0.000186003	-0.005681251	-0.000372334	0.000142	-0.000781155	-0.000485676	0.000830172	0.000531097	0.000737979
3.10E-05	-3.06E-05	1.62E-05	-7.45E-06	-3.43E-06	-1.53E-05	8.30E-05	-3.84E-05	6.04E-05	1.21E-05	-3.74E-05	2.47E-05	4.62E-05	1.17E-05	-4.58E-05	-1.10E-05	-3.81E-05	2.29E-05	-1.35E-05	-5.80E-05	-0.000186831	0.000280744	-4.21E-08	0.000144492	-0.000122609	-4.76E-06	8.92E-05	0.000109128	-0.000612377	0.000126368	1.57E-05	-0.001619068	-0.000628204	0.004300881	0.000514691	0.00080897	0.000132707	-0.000794702	0.000143466	9.51E-05	-8.16E-06	9.88E-06	-0.00017298	-0.004150034	0.000113764	0.000150071	-0.000642433	0.000101366	0.000157586	-6.88E-05
4.37E-05	-0.000153958	1.18E-05	2.15E-05	1.25E-05	2.16E-05	0.000127235	-0.00016437	0.000121235	-1.39E-05	1.62E-05	-2.41E-05	2.36E-05	1.10E-05	3.19E-05	-0.000108712	3.01E-06	3.31E-06	3.10E-06	-0.000221168	-0.000111794	0.000224702	-7.73E-06	4.08E-05	-7.52E-05	-1.71E-05	-1.30E-05	-0.000166032	-0.000152847	-0.000185998	-1.70E-05	-7.53E-05	-0.000502853	-0.000188745	0.003238858	0.000131197	-0.000157923	0.000268506	0.001607655	0.000587275	1.69E-05	-0.000213025	0.000180241	0.000189683	-0.003090873	-0.000968794	-0.000695466	-0.000462538	0.000462948	0.000423305
0.000196916	-0.000257792	-2.21E-05	3.46E-06	-4.42E-05	2.23E-05	0.000220852	-9.91E-05	0.000241027	4.87E-05	4.61E-05	-0.000131342	9.22E-06	-3.61E-05	0.000134875	-5.10E-05	-3.55E-05	-6.31E-05	-5.72E-05	-0.000284524	-0.000419964	0.000276983	4.37E-06	5.63E-05	-6.49E-05	-2.94E-05	-0.000157489	-0.000109206	0.000661729	0.000262843	1.49E-05	-8.14E-05	0.000111248	-5.79E-05	-0.000117417	0.008764512	-5.28E-05	0.00073856	0.001454467	0.001328857	-2.34E-06	1.15E-05	-0.001000715	0.000199137	-0.00085738	-0.009437409	-0.000693806	-0.000368694	0.000593115	0.000694768
-2.41E-05	-0.000152614	6.35E-05	-4.68E-06	0.000163276	-1.62E-05	-0.00016889	0.00015113	-0.000296538	-2.75E-05	-1.09E-05	-5.11E-07	0.00011623	9.96E-06	-6.21E-05	9.53E-05	-3.71E-05	3.64E-05	8.00E-06	0.00033754	-3.53E-05	0.000271384	-1.71E-05	9.09E-05	-9.96E-05	3.42E-05	7.02E-05	-0.000468962	-0.00289245	-0.002071817	5.16E-05	-0.002113029	-0.00198427	0.000469452	0.000884873	0.001391453	0.011414706	0.0022721	0.003187217	0.00386451	-5.40E-06	0.000787694	-0.000484451	-0.000719334	-0.001077519	-0.001383685	-0.009658063	-0.000961706	0.001192895	0.000969392
-9.90E-05	-6.70E-05	1.16E-05	-1.31E-06	6.52E-05	-7.27E-06	-0.000251899	0.000224571	-0.000281798	-2.35E-05	6.52E-06	3.27E-05	3.38E-05	0.000168463	-0.00017596	5.07E-05	-0.00011874	4.74E-05	-2.31E-05	0.000434706	-0.00014133	0.000334728	-3.76E-06	0.000178153	-0.000154011	-8.74E-05	7.40E-05	0.000137509	-0.001227264	-2.79E-05	-2.96E-06	-0.002159622	-1.98E-05	0.000279255	0.000721417	-0.000456334	0.001178685	0.01242523	-0.000674738	-0.000105786	-9.34E-06	0.001052831	0.00095169	-0.000112731	-2.91E-05	-0.000315478	-0.000320639	-0.011250495	0.000977285	0.000338128
[truncated: 18 more columns]
