# Supplementary material for: Estimation of delay to diagnosis and incidence in HIV using indirect evidence of infection dates
Source: BMC Med Res Methodol. 2018 Jun 27;18:65. doi: 10.1186/s12874-018-0522-x (PMC6020319; doi:10.1186/s12874-018-0522-x)
Supplement: Supplementary file 5 — Stan model template file (which is annotated and can be viewed as plain text) to fit the ‘incidence and delay-to-diagnosis’ model with change in incidence prior to and during observation window. (STAN 17 kb) [file 12874_2018_522_MOESM5_ESM.stan]

data{
	int<lower=1> n_pat; //Number of patients
	int<lower=1> N_cd4; //Total number of cd4 observations
	int<lower=1> N_VL; //Total number of VL observations
	int n_cd4_vec[n_pat]; //n cd4 counts per patient
	int n_VL_vec[n_pat]; //n VL counts per patient
	
	vector[n_pat] t_ambig; //observations times for viral sequences, from Dx

	vector[n_pat] ambig; //Ambig proportion observations
	vector[n_pat] sero_int; //Possible range of delay from infection to Dx; here interval from 16th birthday to date of Dx
	vector[N_cd4] sqrt_cd4; //Vector of sqrt-CD4 observations for all patients
	vector[N_cd4] t_cd4;	//Vector of CD4 observation times from Dx (in years) for all patients
	vector[N_VL] log10VL;	//Vector of log10 VL observations for all patients
	vector[N_VL] t_VL;	//Vector of VL observation times from Dx (in years) for all patients
	vector[N_VL] VL_lim_ind;	//Vector denoting whether VL was undetectable (coded -1) or detectable (coded 0) across all patients
	
	vector[68] Para_mean_vec;	//Vector of posterior mean of each model parameter from calibration dataset
	matrix[68,68] Para_V; //Covariance matrix of posterior distribution of model parameters from calibration dataset
	
	vector[n_pat] male_MSW;	//Indicator variable for male patients infected via heterosexual sex
	vector[n_pat] fem_MSW;	//Indicator variable for female patients infected via heterosexual sex
	vector[n_pat] age_at_postest; //Patient age at Dx (in year) centred at 32
	vector[n_pat] black;	//Indicator variable for black ethnicity
	vector[n_pat] other_ethn;	//Indicator variable for other (not black or white) or unknown ethnicity
	vector[n_pat] crf_subt;	//Indicator variable for circulating recombinant form viral subtype
	vector[n_pat] A_subt;	//Indicator variable for viral subtype A
	vector[n_pat] C_subt;	//Indicator variable for viral subtype C
	vector[n_pat] other_subt;	//Indicator variable for other viral subtype
	
	vector[n_pat] t_open_to_tpos;	//Vector of time (in years) from start of analysis window to Dx in each patient

	real T_window;	//Duration of analysis window (in years) for the cohort
	}

parameters {
	//#numbering reflects parameter position in multivariate normal approximation to calibration dataset model
	vector[2] logit_theta; //Parameter vector for probability of zero ambiguity in viral sequence: intercept, coefficient of time since infection. #1-2
	vector[2] log_alpha;	//Parameter vector for alpha values for ambiguity mode: intercept, coefficient of time since infection. #3-4
	vector[2] log_beta;	//Parameter vector for beta values for ambiguity mode: intercept, coefficient of time since infection. #5-6
	real log_kappa; //Log-variance parameter for fractional Brownian motion process. #7
	real logit_H; //Logit-H parameter for fractional Brownian motion process. #8
	real log_vdf; //Log-degrees of freedom parameter for interpatient differences in variability of fractional Brownian motion processes. #9

	corr_matrix[4] Omega; //CD4-VL random effects correlations matrix. #10-15
	vector<lower=0>[4] sigmaU; //CD4-VL random effects SDs. #16-19
	real log_sigma2_cd4; //CD4 residual error variance. #20
	real int_cd4;	//CD4 average intercept parameter. #21
	real slope_cd4;	//CD4 average slope parameter. #22

	real log_sigma_VL;	//VL residual error SD. #23
	vector[4] beta_VL;	//Vector of population average VL parameters. #24-27
	
	real male_MSW_theta; //Male heterosexual adjustment for probability of zero ambiguity on viral sequence. #28

	//Patient characteristic adjustments for sqrt-CD4 intercept
	real male_MSW_int_cd4; //#29
	real fem_MSW_int_cd4; //#30
	real age_int_cd4_1; //#31
	real age_int_cd4_2; //#32
	real black_int_cd4; //#33
	real other_ethn_int_cd4; //#34
	real crf_subt_int_cd4; //#35
	real A_subt_int_cd4; //#36
	real C_subt_int_cd4; //#37
	real other_subt_int_cd4; //#38

	//Patient characteristic adjustments for sqrt-CD4 slope with time since infection
	real male_MSW_slope_cd4; //#39
	real fem_MSW_slope_cd4; //#40
	real age_slope_cd4_1; //#41
	real age_slope_cd4_2; //#42
	real black_slope_cd4; //#43
	real other_ethn_slope_cd4; //#44
	real crf_subt_slope_cd4; //#45
	real A_subt_slope_cd4; //#46
	real C_subt_slope_cd4; //#47
	real other_subt_slope_cd4; //#48

	//Patient characteristic adjustments for log10-VL intercept
	real male_MSW_int_VL; //#49
	real fem_MSW_int_VL; //#50
	real age_int_VL_1; //#51
	real age_int_VL_2; //#52
	real black_int_VL; //#53
	real other_ethn_int_VL; //#54
	real crf_subt_int_VL; //#55
	real A_subt_int_VL; //#56
	real C_subt_int_VL; //#57
	real other_subt_int_VL;//#58

	//Patient characteristic adjustments for log10-VL slope with time since infection
	real male_MSW_slope_VL; //#59
	real fem_MSW_slope_VL; //#60
	real age_slope_VL_1; //#61
	real age_slope_VL_2; //#62
	real black_slope_VL; //#63
	real other_ethn_slope_VL; //#64
	real crf_subt_slope_VL; //#65
	real A_subt_slope_VL; //#66
	real C_subt_slope_VL; //#67
	real other_subt_slope_VL; //#68
	
	real log_lambda;	//Log of lamba-parameter for delay-to-Dx model
	real c_inc;	//c-parameter for log-incidence rate at start of analysis window
	real<lower=0> b_inc_star;	//b-star parameter for incidence change prior to analysis window
	real d_inc;	//d-parameter for incidence change during analysis window													  
	vector<lower=0,upper=1>[n_pat] delay_to_Dx;	//Delay between infection and Dx for each patient scaled from zero (0) to maximum possible (1)
	vector<lower=0>[n_pat] gamma_var;	//Patient-specific gamma variables for CD4 fractional Brownian motion process variability
	vector[2] b_ind[n_pat];	//Patient specific VL intercept and slope random effects

}


transformed parameters {
	//Declaration of 'transformed parameters', sampling statistics can be accessed for all of these variables
	vector[68] Para_vec;	//Calibration model parameters in single vector form (for prior)
	cov_matrix[4] Psi; //Covariance matrix for CD4-VL random effects
	real sigma2_cd4; //CD4 measurement error variance
	real kappa;	//CD4 fractional Brownian motion parameter
	real H; //CD4 fractional Brownian motion parameter
	real doubleH; //CD4 fractional Brownian motion parameter, double for calculations
	real vdf; //CD4 fractional Brownian motion inter-patients variability parameter
	real half_vdf;	//CD4 fractional Brownian motion inter-patients variability parameter, halved for calculations
	real sigma_VL;	//VL measurement error SD
	real lambda;	//lambda parameter for delay-to-Dx model
	real A_cons;	//Normalising factor for Poisson process model
	real b_inc;	//Parameter for incidence model

	matrix[2,2] Psi_CD4_orig;	//CD4-only submatrix of CD4-VL random effects covariance matrix
	matrix[2,2] Psi_VL_orig;	//VL-only submatrix of CD4-VL random effects covariance matrix
	matrix[2,2] Psi_VL_inv;	//Inverse of VL submatrix
    matrix[2,2] Psi_CD4_VL;	//CD4-VL covariance submatrix

	vector[n_pat] delay_to_Dx_y; // Patient-specific delay-to-Dx scaled to years
	vector[n_pat] t_tinf_rel_open;	//Time of infection relative to start of analysis window (negative values represent infection before window, positive values during)

	//Calculation of 'transformed parameters' in terms of decalred parameters
	sigma2_cd4 = exp(log_sigma2_cd4);
	kappa = exp(log_kappa);
	H = inv_logit(logit_H);
	doubleH=2*H;
	vdf = exp(log_vdf);
	half_vdf = vdf/2;
 	sigma_VL = exp(log_sigma_VL);
	lambda=exp(log_lambda);

	b_inc= -lambda+b_inc_star;
	A_cons= (exp(c_inc)-exp(c_inc-lambda*T_window))/(lambda+b_inc) + (exp(c_inc)*(d_inc*(exp(-lambda*T_window)-1)+lambda*(exp(d_inc*T_window)-1)))/(d_inc*(d_inc+lambda));
	delay_to_Dx_y = rows_dot_product(delay_to_Dx,sero_int);
	
	t_tinf_rel_open =  t_open_to_tpos - delay_to_Dx_y; // only care if this is negative... or positive...
  for (m in 1:4)
    Psi[m,m] = sigmaU[m] * sigmaU[m] * Omega[m,m];
  for (m in 1:(4-1)) {
    for (n in (m+1):4) {
      Psi[m,n] = sigmaU[m] * sigmaU[n] * Omega[m,n];
      Psi[n,m] = Psi[m,n];
     }
    }
	
	
	Psi_CD4_orig[1,1] = Psi[1,1];
    Psi_CD4_orig[1,2] = Psi[1,2];
    Psi_CD4_orig[2,1] = Psi[2,1];
    Psi_CD4_orig[2,2] = Psi[2,2];
	
    Psi_VL_orig[1,1] = Psi[3,3];
    Psi_VL_orig[1,2] = Psi[3,4];
    Psi_VL_orig[2,1] = Psi[4,3];
    Psi_VL_orig[2,2] = Psi[4,4];
	
	Psi_CD4_VL[1,1] = Psi[1,3];
    Psi_CD4_VL[1,2] = Psi[1,4];
	Psi_CD4_VL[2,1] = Psi[2,3];
	Psi_CD4_VL[2,2] = Psi[2,4];
	
	Psi_VL_inv=inverse_spd(Psi_VL_orig);
	
	//Calibration model parameters read into single vector
	Para_vec[1]= logit_theta[1];
	Para_vec[2]= logit_theta[2];
	Para_vec[3]= log_alpha[1];
	Para_vec[4]= log_alpha[2];
	Para_vec[5]= log_beta[1];
	Para_vec[6]= log_beta[2];
	Para_vec[7]= log_kappa;
	Para_vec[8]= logit_H;
	Para_vec[9]= log_vdf;
	Para_vec[10]= Omega[2,1];
	Para_vec[11]= Omega[3,1];
	Para_vec[12]= Omega[3,2];
	Para_vec[13]= Omega[4,1];
	Para_vec[14]= Omega[4,2];
	Para_vec[15]= Omega[4,3];
	Para_vec[16]= sigmaU[1];
	Para_vec[17]= sigmaU[2];
	Para_vec[18]= sigmaU[3];
	Para_vec[19]= sigmaU[4];
	Para_vec[20]= log_sigma2_cd4;
	Para_vec[21]= int_cd4;
	Para_vec[22]= slope_cd4;
	Para_vec[23]= log_sigma_VL;
	Para_vec[24]= beta_VL[1];
	Para_vec[25]= beta_VL[2];
	Para_vec[26]= beta_VL[3];
	Para_vec[27]= beta_VL[4];
	
	Para_vec[28]=male_MSW_theta;
	
	Para_vec[29]=male_MSW_int_cd4;
	Para_vec[30]=fem_MSW_int_cd4;
	Para_vec[31]=age_int_cd4_1;
	Para_vec[32]=age_int_cd4_2;
	Para_vec[33]=black_int_cd4;
	Para_vec[34]=other_ethn_int_cd4;
	Para_vec[35]=crf_subt_int_cd4;
	Para_vec[36]=A_subt_int_cd4;
	Para_vec[37]=C_subt_int_cd4; 
	Para_vec[38]=other_subt_int_cd4;
	
	Para_vec[39]=male_MSW_slope_cd4;
	Para_vec[40]=fem_MSW_slope_cd4;
	Para_vec[41]=age_slope_cd4_1;
	Para_vec[42]=age_slope_cd4_2;
	Para_vec[43]=black_slope_cd4;
	Para_vec[44]=other_ethn_slope_cd4;
	Para_vec[45]=crf_subt_slope_cd4;
	Para_vec[46]=A_subt_slope_cd4;
	Para_vec[47]=C_subt_slope_cd4;
	Para_vec[48]=other_subt_slope_cd4;
	
	Para_vec[49]=male_MSW_int_VL;
	Para_vec[50]=fem_MSW_int_VL; 
	Para_vec[51]=age_int_VL_1;
	Para_vec[52]=age_int_VL_2; 
	Para_vec[53]=black_int_VL;
	Para_vec[54]=other_ethn_int_VL;
	Para_vec[55]=crf_subt_int_VL;
	Para_vec[56]=A_subt_int_VL;
	Para_vec[57]=C_subt_int_VL;
	Para_vec[58]=other_subt_int_VL;
	
	Para_vec[59]=male_MSW_slope_VL;
	Para_vec[60]=fem_MSW_slope_VL;
	Para_vec[61]=age_slope_VL_1; 
	Para_vec[62]=age_slope_VL_2;
	Para_vec[63]=black_slope_VL;
	Para_vec[64]=other_ethn_slope_VL;
	Para_vec[65]=crf_subt_slope_VL; 
	Para_vec[66]=A_subt_slope_VL;
	Para_vec[67]=C_subt_slope_VL;
	Para_vec[68]=other_subt_slope_VL;
	
   }


model {
	//Declarations of temporary variables for model calculations
	real theta_i;
	real alpha_i;
	real beta_i;
	real t_inf_to_seq_i;	//Time from infection to viral sequencing, overwritten for each patient
	real age_at_postest_i;	//Age at Dx, overwritten for each patient
	int pos_cd4;
	int pos_VL;

	//The following two lines are index variables for CD4 and VL values and observation times, incremented from 1
	pos_cd4=1;
	pos_VL=1;

	for (i in 1:n_pat) {

	//Viral ambiguity model
    age_at_postest_i = age_at_postest[i] - delay_to_Dx_y[i]; //age is reduced at infection if true date is further back in time
	t_inf_to_seq_i= t_ambig[i]+delay_to_Dx_y[i];
	theta_i= inv_logit(logit_theta[1] + t_inf_to_seq_i*logit_theta[2]+ male_MSW[i]*male_MSW_theta);
	alpha_i= exp(log_alpha[1] + t_inf_to_seq_i*log_alpha[2]);
	beta_i= exp(log_beta[1] + t_inf_to_seq_i*log_beta[2]);
	//Log-probability contribution for viral sequence ambiguity
	if (ambig[i] == 0)
		1 ~ bernoulli(theta_i);
	else {
		0 ~ bernoulli(theta_i);
		ambig[i] ~ beta(alpha_i,beta_i);
		}

	//CD4 model if any recorded for i^th patient
	if (n_cd4_vec[i]>0) {
		real kappa_i;
		vector[n_cd4_vec[i]] mu;	//Expected mean vector for CD4 observations, adjusted for patient characteristics and VL random effect terms
		vector[n_cd4_vec[i]] t_cd4_from_Dx;		
		vector[n_cd4_vec[i]] t_cd4_from_inf;
		vector[2] Mu_CD4_orig;	//Patient characteristic-adjusted CD4 intercept and slope before adjustment according to VL random effect terms
		vector[2] Mu_CD4_adj;	//Patient characteristic-adjusted CD4 intercept and slope after adjustment according to VL random effect terms
		matrix[n_cd4_vec[i],2] Z_i; // Patient-specific Z-matrix for CD4 model (adjusted for Dx delay)
		matrix[n_cd4_vec[i],n_cd4_vec[i]] Sigma_i;	//Patient-specific covariance matrix for CD4 observations, including contributions from random effects, measurement error and fBM process
		matrix[2,2] Psi_CD4_adj;	//CD4 random effects covariance matrix adjusted for VL random effect variables
		kappa_i = kappa/gamma_var[i];	//Patient-specific fBM variance parameter

		//Read in CD4 observation times and adjust for Dx delay
		for (j in 1:n_cd4_vec[i]) {
				t_cd4_from_Dx[j]=t_cd4[pos_cd4+j-1];
				}
			t_cd4_from_inf= t_cd4_from_Dx+delay_to_Dx_y[i];
			
		//Calculate CD4 intercept and slope adjusted for patient characteristics
		//NOTE: quadratic term for age effect is multiplied by '0.001' for numerical stability
		Mu_CD4_orig[1] = int_cd4+ male_MSW[i]*male_MSW_int_cd4 + fem_MSW[i]*fem_MSW_int_cd4+ age_int_cd4_1*age_at_postest_i+age_int_cd4_2*0.001*age_at_postest_i^2 + black[i]*black_int_cd4+ other_ethn[i]*other_ethn_int_cd4 + crf_subt[i]*crf_subt_int_cd4+ A_subt[i]*A_subt_int_cd4+ C_subt[i]*C_subt_int_cd4+ other_subt[i]*other_subt_int_cd4;
		Mu_CD4_orig[2] = slope_cd4+ male_MSW[i]*male_MSW_slope_cd4 + fem_MSW[i]*fem_MSW_slope_cd4+ age_slope_cd4_1*age_at_postest_i+age_slope_cd4_2*0.001*age_at_postest_i^2 + black[i]*black_slope_cd4+ other_ethn[i]*other_ethn_slope_cd4 + crf_subt[i]*crf_subt_slope_cd4+ A_subt[i]*A_subt_slope_cd4+ C_subt[i]*C_subt_slope_cd4+ other_subt[i]*other_subt_slope_cd4;

		//Adjustment of CD4 distribution for VL intercept and slope, using conditional MVN form
		Mu_CD4_adj = Mu_CD4_orig +  Psi_CD4_VL*Psi_VL_inv*b_ind[i];
		Psi_CD4_adj = Psi_CD4_orig - Psi_CD4_VL*Psi_VL_inv*Psi_CD4_VL';

		//Construct characteristic and VL random effect-adjusted CD4 mean vector and covariance matrix
			Z_i[,1]=rep_vector(1,n_cd4_vec[i]);
			Z_i[,2]=t_cd4_from_inf;
			Sigma_i= Z_i*Psi_CD4_adj*Z_i' + diag_matrix(rep_vector(sigma2_cd4, n_cd4_vec[i]));
			for (j in 1:n_cd4_vec[i]){
				for (k in 1:n_cd4_vec[i]) {
					if(j==k) {Sigma_i[j,k]= Sigma_i[j,k]+kappa_i*t_cd4_from_inf[k]^doubleH;}
					else {Sigma_i[j,k]= Sigma_i[j,k]+0.5*kappa_i*(t_cd4_from_inf[j]^doubleH+t_cd4_from_inf[k]^doubleH-fabs(t_cd4_from_Dx[k]-t_cd4_from_Dx[j])^doubleH);}
				}
			}
			mu = Z_i*Mu_CD4_adj;
		
			//Log-probability contribution for CD4 observations in i^th patient, conditional on VL random effects
			segment(sqrt_cd4, pos_cd4, n_cd4_vec[i])~ multi_normal(mu, Sigma_i);

			//Increment indexing variable to move on to next patient
			pos_cd4= pos_cd4 + n_cd4_vec[i];
		}
	
	//VL model if any recorded for i^th patient
	if (n_VL_vec[i]>0) {
			real mu_VL_int_tmp;
			real mu_VL_slope_tmp;
			vector[n_VL_vec[i]] mu_VL;
			vector[n_VL_vec[i]] t_VL_orig;		
			vector[n_VL_vec[i]] t_VL_adj;

		for (j in 1:n_VL_vec[i]) {
				t_VL_orig[j]=t_VL[pos_VL+j-1];
				}
			t_VL_adj= t_VL_orig+delay_to_Dx_y[i];
			
			mu_VL_int_tmp = beta_VL[1] + b_ind[i,1] + male_MSW[i]*male_MSW_int_VL + fem_MSW[i]*fem_MSW_int_VL+ age_int_VL_1*age_at_postest_i+age_int_VL_2*0.001*age_at_postest_i^2+ black[i]*black_int_VL+ other_ethn[i]*other_ethn_int_VL + crf_subt[i]*crf_subt_int_VL+ A_subt[i]*A_subt_int_VL+ C_subt[i]*C_subt_int_VL+ other_subt[i]*other_subt_int_VL;
			mu_VL_slope_tmp = beta_VL[2] + b_ind[i,2] + male_MSW[i]*male_MSW_slope_VL + fem_MSW[i]*fem_MSW_slope_VL+ age_slope_VL_1*age_at_postest_i+age_slope_VL_2*0.001*age_at_postest_i^2+ black[i]*black_slope_VL+ other_ethn[i]*other_ethn_slope_VL + crf_subt[i]*crf_subt_slope_VL+ A_subt[i]*A_subt_slope_VL+ C_subt[i]*C_subt_slope_VL+ other_subt[i]*other_subt_slope_VL;
			
			mu_VL = mu_VL_int_tmp + mu_VL_slope_tmp*t_VL_adj + beta_VL[3]*exp(-exp(beta_VL[4])*t_VL_adj);

			//Log-probability contribution for VL
			for (j in 1:n_VL_vec[i]) {
				if(VL_lim_ind[pos_VL+j-1]==-1) {target+=normal_lcdf(log10VL[pos_VL+j-1] | mu_VL[j], sigma_VL);} //VL below limit of detection
				else if(VL_lim_ind[pos_VL+j-1]==1) {target+= normal_lccdf(log10VL[pos_VL+j-1] | mu_VL[j], sigma_VL);} //VL above limit of detection
				else {log10VL[pos_VL+j-1]~normal(mu_VL[j], sigma_VL);}	//VL within lower and upper limits of detection
				}

				//Increment indexing variable to move on to next patient
				pos_VL= pos_VL + n_VL_vec[i];
			}
	
	delay_to_Dx_y[i]~exponential(lambda);	//Log_probability contribution for delay-to-Dx in i^th patient
	target += c_inc + b_inc*t_tinf_rel_open[i] + (d_inc-b_inc)*0.05*log1p_exp(20*t_tinf_rel_open[i]);	//Log_probability contribution for infection time in i^th patient

	}	//End of loop for N patients
	
	b_ind~multi_normal(rep_vector(0,2), Psi_VL_orig);	//'Vectorised' log_probability contribution for VL random effect terms in all patients
	target += -A_cons;	//Log_probability contribution for normalising factor of Poisson process
	gamma_var~gamma(half_vdf,half_vdf);	//'Vectorised' log_probability contribution for CD4 fBM variablity latent variables in each patient
	
	log_lambda~normal(0,3);	//Prior log_probability contribution for delay-to-Dx lambda parameter
	
	Para_vec~multi_normal(Para_mean_vec,Para_V);	//Prior log_probability contribution for calibration model parameters
}
